# Supplementary material for: HPLC-DVD combined with chemometrics to analyze the correlation between the Q-marker content and color of Corni Fructus
Source: Royal Society of Chemistry journal article supplement (doi:10.1039/d1fo03866d), 2022-01-01

## Supplementary materials

### Supplementary tables

**Tab. S1** Information Table for 29 Sample Collection Sites of *Cornus officinalis*

| Batch.NO | Locality          | longitude (E) | latitude (N) | altitude (m) |
|----------|-------------------|---------------|--------------|--------------|
| 1        | LongGang Town     | 119.1092      | 30.2418      | 140          |
| 2        | FenKou Town       | 118.5458      | 29.4393      | 110          |
| 3        | HuaYang Town      | 107.5334      | 33.5979      | 1150         |
| 4        | XiChahe Town      | 107.9794      | 33.4653      | 880          |
| 5        | ShiDunhe Town     | 108.0825      | 33.4428      | 700          |
| 6        | DaHeba Town       | 108.0213      | 33.3523      | 530          |
| 7        | YueBa Town        | 107.8453      | 33.4797      | 1120         |
| 8        | ChangJiaoba Town  | 107.9592      | 33.6944      | 1120         |
| 9        | YueJiazhuang Town | 107.9928      | 33.5078      | 1100         |
| 10       | CaiChuan Town     | 110.3071      | 33.8565      | 1260         |
| 11       | WuGuan Town       | 110.6604      | 33.6304      | 480          |
| 12       | TuMen Town        | 110.3253      | 33.4636      | 480          |
| 13       | YuLing Town       | 110.4967      | 33.9010      | 1270         |
| 14       | ChenHe Town       | 108.2085      | 34.2134      | 690          |
| 15       | JingKou Town      | 107.1776      | 34.0399      | 1400         |
| 16       | TanTou Town       | 111.7592      | 34.0080      | 480          |
| 17       | MaShankou Town    | 112.0113      | 33.1938      | 220          |
| 18       | ZhuLin Town       | 113.1451      | 34.7127      | 330          |

|    |                |          |          |      |
|----|----------------|----------|----------|------|
| 19 | YangCheng Town | 111.6968 | 33.2788  | 310  |
| 20 | DanShui Town   | 111.7475 | 33.1580  | 220  |
| 21 | MiPing Town    | 111.4758 | 33.66201 | 860  |
| 22 | QvGou Town     | 114.2197 | 36.1121  | 100  |
| 23 | YaoShan Town   | 112.3793 | 33.7587  | 350  |
| 24 | YunTai Town    | 105.6752 | 33.4450  | 1300 |
| 25 | XinCheng Town  | 111.6659 | 35.2830  | 580  |
| 26 | MangHe Town    | 112.4470 | 35.3877  | 720  |
| 27 | MoZitan Town   | 116.2846 | 31.2188  | 230  |
| 28 | XiaoBa Town    | 104.3186 | 31.6394  | 640  |
| 29 | JingFu Town    | 105.1668 | 30.9055  | 430  |

---

**Tab. S2** RGB values of 29 batches of Corni Fructus.

| NO. | R      | G     | B     |
|-----|--------|-------|-------|-----|--------|-------|-------|-----|--------|-------|-------|-----|--------|-------|-------|
| 1   | 107.69 | 58.35 | 51.16 | 9   | 113.86 | 62.58 | 54.45 | 17  | 108.51 | 66.31 | 57.1  | 25  | 106.42 | 65.67 | 58.12 |
|     | 108.56 | 55.93 | 48.63 |     | 116.67 | 63.73 | 54.76 |     | 112.35 | 71.87 | 63.14 |     | 107.9  | 66.85 | 59.17 |
|     | 108.60 | 57.76 | 52.18 |     | 116.26 | 63.64 | 55.89 |     | 108.03 | 64.88 | 55.37 |     | 109.19 | 67.04 | 60.05 |
|     | 108.73 | 57.36 | 50.52 |     | 117.13 | 63.89 | 55.83 |     | 108.44 | 64.99 | 54.69 |     | 108.99 | 65.92 | 58.17 |
| 2   | 110.44 | 54.72 | 44.75 | 10  | 115.74 | 69.06 | 62.32 | 18  | 126.72 | 85.39 | 75.19 | 26  | 121.30 | 66.92 | 55.98 |
|     | 111.51 | 55.19 | 45.36 |     | 113.30 | 66.40 | 58.99 |     | 123.44 | 81.51 | 71.93 |     | 123.52 | 69.07 | 58.32 |
|     | 108.05 | 53.40 | 44.04 |     | 109.72 | 62.98 | 55.32 |     | 124.48 | 87.98 | 79.33 |     | 123.21 | 68.06 | 57.91 |
|     | 109.32 | 54.41 | 45.04 |     | 113.35 | 66.35 | 58.2  |     | 123.28 | 82.62 | 72.82 |     | 126.95 | 72.80 | 61.62 |
| 3   | 125.08 | 53.67 | 46.96 | 11  | 109.23 | 70.09 | 66.08 | 19  | 134.92 | 64.5  | 54.72 | 27  | 109.53 | 73.72 | 64.00 |
|     | 126.92 | 51.88 | 46.21 |     | 106.60 | 66.02 | 61.57 |     | 133.38 | 64.02 | 53.99 |     | 107.83 | 72.88 | 63.05 |
|     | 124.59 | 51.75 | 45.93 |     | 105.83 | 65.47 | 61.10 |     | 132.47 | 63.88 | 54.70 |     | 106.35 | 71.89 | 62.68 |
|     | 127.72 | 54.85 | 49.56 |     | 106.29 | 65.72 | 60.83 |     | 129.35 | 61.57 | 52.29 |     | 106.45 | 72.06 | 61.53 |
| 4   | 107.41 | 57.28 | 50.14 | 12  | 116.64 | 56.04 | 49.95 | 20  | 107.98 | 47.64 | 41.26 | 28  | 135.87 | 51.7  | 40.79 |
|     | 106.07 | 56.24 | 49.58 |     | 118.77 | 56.63 | 49.51 |     | 108.82 | 48.2  | 42.23 |     | 135.89 | 50.85 | 39.96 |
|     | 108.77 | 59.43 | 51.85 |     | 120.82 | 57.03 | 50.75 |     | 110.03 | 46.97 | 39.84 |     | 137.89 | 51.00 | 39.34 |

|   |        |       |       |    |        |       |       |    |        |       |       |    |        |       |       |
|---|--------|-------|-------|----|--------|-------|-------|----|--------|-------|-------|----|--------|-------|-------|
|   | 106.32 | 55.01 | 48.21 |    | 121.54 | 58.16 | 49.98 |    | 109.75 | 49.14 | 41.99 |    | 134.36 | 49.77 | 38.78 |
| 5 | 119.47 | 49.35 | 43.77 | 13 | 109.83 | 66.85 | 59.5  | 21 | 112.56 | 54.57 | 48.41 | 29 | 121.59 | 46.32 | 40.60 |
|   | 118.88 | 47.67 | 41.06 |    | 112.32 | 69.43 | 61.64 |    | 112.79 | 53.43 | 48.37 |    | 119.52 | 45.52 | 39.54 |
|   | 118.49 | 47.22 | 40.30 |    | 112.19 | 70.94 | 64.38 |    | 113.91 | 52.86 | 47.69 |    | 123.97 | 47.27 | 42.15 |
|   | 117.33 | 47.19 | 40.90 |    | 110.55 | 67.7  | 59.64 |    | 116.34 | 55.99 | 50.53 |    | 123.16 | 48.56 | 43.29 |
| 6 | 108.03 | 59.32 | 52.92 | 14 | 95.53  | 58.13 | 54.89 | 22 | 123.86 | 72.07 | 63.95 |    |        |       |       |
|   | 111.01 | 60.91 | 53.79 |    | 91.61  | 54.63 | 51.53 |    | 126.95 | 72.8  | 61.62 |    |        |       |       |
|   | 118.90 | 66.10 | 58.25 |    | 93.78  | 56.54 | 53.4  |    | 122.49 | 67.84 | 58.89 |    |        |       |       |
|   | 114.30 | 61.76 | 53.61 |    | 94.76  | 57.86 | 54.6  |    | 120.27 | 59.63 | 51.16 |    |        |       |       |
| 7 | 124.87 | 56.13 | 51.51 | 15 | 123.06 | 60.26 | 53.13 | 23 | 125.30 | 75.38 | 62.20 |    |        |       |       |
|   | 119.91 | 54.40 | 48.68 |    | 119.04 | 57.70 | 51.14 |    | 124.44 | 72.98 | 60.53 |    |        |       |       |
|   | 124.67 | 56.94 | 50.61 |    | 119.46 | 59.86 | 53.23 |    | 124.62 | 76.86 | 65.12 |    |        |       |       |
|   | 122.48 | 53.68 | 47.98 |    | 121.28 | 59.74 | 52.86 |    | 125.41 | 77.25 | 67.31 |    |        |       |       |
| 8 | 134.7  | 76.69 | 67.66 | 16 | 128.29 | 56.91 | 49.98 | 24 | 98.44  | 56.50 | 50.90 |    |        |       |       |
|   | 132.58 | 75.04 | 65.96 |    | 126.25 | 56.91 | 49.75 |    | 99.73  | 57.87 | 51.25 |    |        |       |       |
|   | 137.40 | 80.33 | 71.14 |    | 133.55 | 63.79 | 56.62 |    | 98.57  | 56.71 | 50.81 |    |        |       |       |
|   | 134.82 | 75.06 | 65.76 |    | 134.98 | 62.13 | 54.76 |    | 97.78  | 56.50 | 49.90 |    |        |       |       |

---

**Tab. S3** Calibration curves, correlation coefficients, test ranges, precision, repeatability and recovery tests for seven analytes.

| Analyte             | Calibration curve  | R2     | Test Ranges<br>( $\mu\text{g/ml}$ ) | precision<br>(%) | stability<br>(%) | Repeatability<br>(%) | Original<br>mean<br>( $\mu\text{g}$ ) | Spiked<br>mean<br>( $\mu\text{g}$ ) | Detected<br>mean ( $\mu\text{g}$ ) | Recovery<br>mean (%) | RSD (%) |
|---------------------|--------------------|--------|-------------------------------------|------------------|------------------|----------------------|---------------------------------------|-------------------------------------|------------------------------------|----------------------|---------|
| gallic acid         | $Y=0.0026x+0.0046$ | 0.9999 | 0.053 ~ 0.844                       | 1.97             | 1.22             | 0.79                 | 0.290                                 | 0.338                               | 0.625                              | 99.11                | 3.17    |
| 5-HMF               | $Y=0.0031x+0.0016$ | 0.9995 | 0.060 ~ 0.964                       | 1.25             | 1.15             | 2.23                 | 0.821                                 | 0.647                               | 1.467                              | 99.82                | 6.47    |
| protocatechuic acid | $Y=0.0016x+0.0024$ | 0.9998 | 0.052 ~ 0.824                       | 1.59             | 0.65             | 0.89                 | 0.093                                 | 0.089                               | 0.181                              | 98.69                | 6.73    |
| morroneiside        | $Y=0.0116x+0.0025$ | 0.9999 | 0.053 ~ 0.840                       | 0.93             | 2.15             | 0.97                 | 14.278                                | 9.707                               | 24.273                             | 102.96               | 4.94    |
| sweroside           | $Y=0.0073x+0.0017$ | 0.9999 | 0.050 ~ 0.796                       | 1.57             | 0.83             | 1.03                 | 0.893                                 | 1.026                               | 1.918                              | 99.87                | 2.98    |
| loganin             | $Y=0.0155x+0.0034$ | 0.9999 | 0.037 ~ 0.592                       | 1.02             | 0.73             | 1.33                 | 7.880                                 | 7.565                               | 15.445                             | 98.35                | 2.83    |
| cor-nuside          | $Y=0.0062x+0.0056$ | 0.9999 | 0.049 ~ 0.780                       | 1.85             | 0.71             | 0.75                 | 1.486                                 | 1.287                               | 2.816                              | 103.30               | 8.83    |

**Tab. S4** Content of seven analytes in different sample batches. (mg/g, n=3)

| Batch No. | gallic acid |       | 5-HMF   |       | protocatechuic acid |       | morrnisode |       | sweroside |       | loganin |       | cor-nuside |       |
|-----------|-------------|-------|---------|-------|---------------------|-------|------------|-------|-----------|-------|---------|-------|------------|-------|
|           | Content     | RSD   | Content | RSD   | Content             | RSD   | Content    | RSD   | Content   | RSD   | Content | RSD   | Content    | RSD   |
| 1         | 0.613       | 0.357 | 0.869   | 0.704 | 0.112               | 2.560 | 10.267     | 0.661 | 1.136     | 9.467 | 7.460   | 0.775 | 1.435      | 1.564 |
| 2         | 0.338       | 5.250 | 0.647   | 3.709 | 0.089               | 3.133 | 9.707      | 3.414 | 1.026     | 0.859 | 7.565   | 1.366 | 1.287      | 3.015 |
| 3         | 0.219       | 2.425 | 0.648   | 2.856 | 0.072               | 1.538 | 15.776     | 3.247 | 0.583     | 2.258 | 8.259   | 0.603 | 1.119      | 4.053 |
| 4         | 0.187       | 9.901 | 0.544   | 2.680 | 0.086               | 1.123 | 10.922     | 3.335 | 0.921     | 1.934 | 4.139   | 3.164 | 1.272      | 1.503 |
| 5         | 0.232       | 3.907 | 1.149   | 1.576 | 0.105               | 0.875 | 17.976     | 2.778 | 0.909     | 3.762 | 9.530   | 1.037 | 1.957      | 0.557 |
| 6         | 0.323       | 3.666 | 1.062   | 2.861 | 0.107               | 1.005 | 18.404     | 2.397 | 0.976     | 3.427 | 8.614   | 0.831 | 2.093      | 1.538 |
| 7         | 0.442       | 6.463 | 0.876   | 1.204 | 0.100               | 3.953 | 12.883     | 3.689 | 0.942     | 1.012 | 9.170   | 1.266 | 1.188      | 1.842 |
| 8         | 0.190       | 8.687 | 1.036   | 4.746 | 0.082               | 1.029 | 21.024     | 0.910 | 0.854     | 3.363 | 9.033   | 0.860 | 1.637      | 1.701 |
| 9         | 0.273       | 2.209 | 0.798   | 2.851 | 0.091               | 5.285 | 13.317     | 1.891 | 0.739     | 1.522 | 7.225   | 1.120 | 1.599      | 2.178 |
| 10        | 0.258       | 3.227 | 0.644   | 2.555 | 0.124               | 0.690 | 16.560     | 4.603 | 0.872     | 3.558 | 9.486   | 1.952 | 2.157      | 2.533 |
| 11        | 0.845       | 0.553 | 0.752   | 0.631 | 0.111               | 8.358 | 11.722     | 2.483 | 1.113     | 1.800 | 8.218   | 1.161 | 1.820      | 1.641 |
| 12        | 0.429       | 1.080 | 1.086   | 2.899 | 0.082               | 2.604 | 17.374     | 3.190 | 0.973     | 1.066 | 9.071   | 1.541 | 2.084      | 1.784 |
| 13        | 0.537       | 1.088 | 1.116   | 1.701 | 0.214               | 1.003 | 13.478     | 2.379 | 1.173     | 3.297 | 11.200  | 2.945 | 2.513      | 1.841 |
| 14        | 0.179       | 3.834 | 0.741   | 2.428 | 0.084               | 1.146 | 10.414     | 0.903 | 0.802     | 5.318 | 8.629   | 2.635 | 2.701      | 0.667 |
| 15        | 0.241       | 5.549 | 0.999   | 2.598 | 0.091               | 1.280 | 16.702     | 4.117 | 0.892     | 1.672 | 10.444  | 1.913 | 1.568      | 1.257 |
| 16        | 0.173       | 1.787 | 0.444   | 4.539 | 0.073               | 2.234 | 21.264     | 0.291 | 0.593     | 5.677 | 10.244  | 2.628 | 1.107      | 1.905 |
| 17        | 0.433       | 3.261 | 0.779   | 4.551 | 0.051               | 3.831 | 10.392     | 0.780 | 1.170     | 2.969 | 7.469   | 1.075 | 2.439      | 0.593 |
| 18        | 0.226       | 1.301 | 0.345   | 6.078 | 0.088               | 0.849 | 11.768     | 2.397 | 0.876     | 3.031 | 9.407   | 2.880 | 1.536      | 2.483 |
| 19        | 0.318       | 1.952 | 1.147   | 1.553 | 0.086               | 2.964 | 19.351     | 0.495 | 1.036     | 1.969 | 11.619  | 0.856 | 2.257      | 1.146 |

|    |       |       |       |       |       |       |        |       |       |       |        |       |       |       |
|----|-------|-------|-------|-------|-------|-------|--------|-------|-------|-------|--------|-------|-------|-------|
| 20 | 0.243 | 5.720 | 1.040 | 1.633 | 0.087 | 0.465 | 9.390  | 1.920 | 1.064 | 3.402 | 8.618  | 1.999 | 2.323 | 2.905 |
| 21 | 0.274 | 5.404 | 1.055 | 4.009 | 0.076 | 2.347 | 16.665 | 1.446 | 0.956 | 4.849 | 8.502  | 1.300 | 1.947 | 2.342 |
| 22 | 0.193 | 5.762 | 0.878 | 2.190 | 0.077 | 3.976 | 18.212 | 0.016 | 0.926 | 1.923 | 10.048 | 1.647 | 2.054 | 0.938 |
| 23 | 0.388 | 3.539 | 0.689 | 2.694 | 0.099 | 0.900 | 19.313 | 0.829 | 1.008 | 2.477 | 11.311 | 1.479 | 2.897 | 0.639 |
| 24 | 0.875 | 1.788 | 0.306 | 5.628 | 0.210 | 0.642 | 9.271  | 5.694 | 1.375 | 2.497 | 5.428  | 3.908 | 1.045 | 2.120 |
| 25 | 0.904 | 1.778 | 0.949 | 1.823 | 0.127 | 2.487 | 22.960 | 0.727 | 1.622 | 1.452 | 6.056  | 1.801 | 1.902 | 1.686 |
| 26 | 0.343 | 4.525 | 0.720 | 8.064 | 0.106 | 1.522 | 20.003 | 3.463 | 1.252 | 5.699 | 9.953  | 2.082 | 1.743 | 2.367 |
| 27 | 0.457 | 5.625 | 1.176 | 2.741 | 0.038 | 1.474 | 23.581 | 3.243 | 1.131 | 1.190 | 9.007  | 1.404 | 2.638 | 3.045 |
| 28 | 0.178 | 3.607 | 1.251 | 1.702 | 0.064 | 5.819 | 22.853 | 5.296 | 1.019 | 3.422 | 11.036 | 1.175 | 1.335 | 0.831 |
| 29 | 0.208 | 6.297 | 0.876 | 1.745 | 0.067 | 2.907 | 15.811 | 0.597 | 1.038 | 1.260 | 9.330  | 1.252 | 1.884 | 1.679 |

---

**Table S5.**The average weight of mice in each group after drug intervention (g, n=10)

| Group | CG         | MG         | L-LOG      | M-LOG      | H-LOG      |
|-------|------------|------------|------------|------------|------------|
| 1W    | 27.00±2.15 | 26.42±2.77 | 26.85±1.48 | 26.89±2.16 | 26.46±1.63 |
| 2W    | 27.43±2.21 | 24.97±1.05 | 25.20±1.24 | 26.56±1.94 | 26.84±0.71 |
| 3W    | 26.93±2.37 | 24.89±2.04 | 24.84±1.00 | 26.55±1.56 | 26.58±1.25 |
| 4W    | 27.24±1.78 | 25.33±1.45 | 25.20±1.01 | 26.41±1.52 | 26.88±0.88 |
| 5W    | 27.09±1.44 | 24.94±1.28 | 26.34±2.04 | 26.83±1.44 | 26.23±0.78 |
| 6W    | 27.78±1.54 | 25.99±1.01 | 26.74±1.96 | 27.15±1.62 | 27.60±0.68 |
| 7W    | 27.63±1.32 | 25.06±1.06 | 26.48±2.10 | 26.58±1.55 | 27.24±0.67 |
| 8W    | 28.53±1.22 | 25.21±0.98 | 27.77±2.19 | 28.02±1.87 | 28.60±1.31 |



## Supplementary figures

Fig. S1 29 batch co fingerprint similarity correlation plot

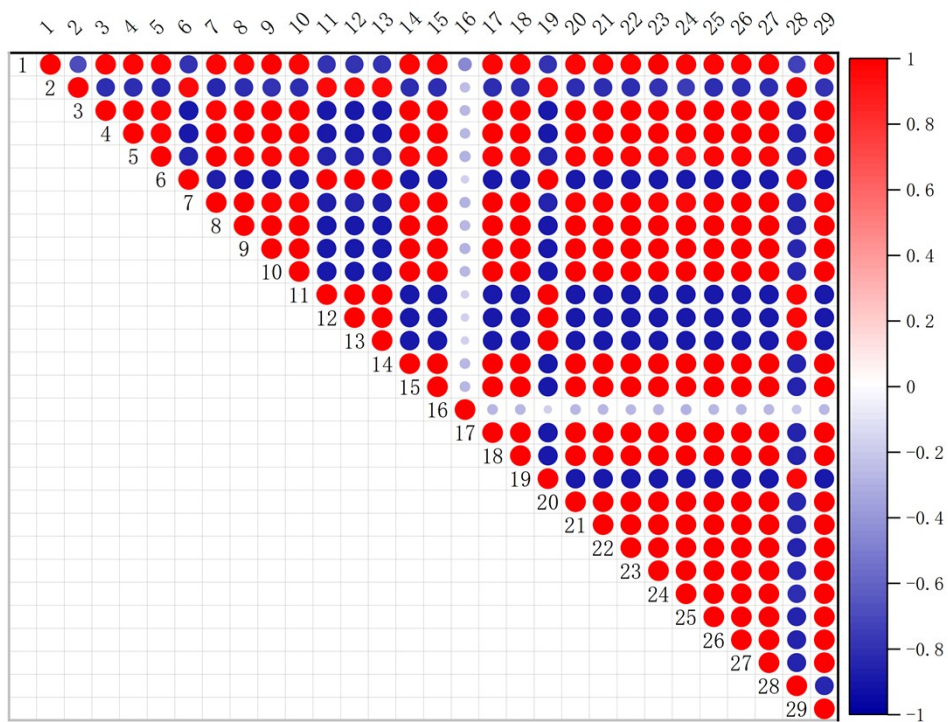

**Fig. S2** Loganin structure and purity identification. (A) structure; (B) HPLC; (C) LC-MS; (D) H-NMR; (E) C-NMR

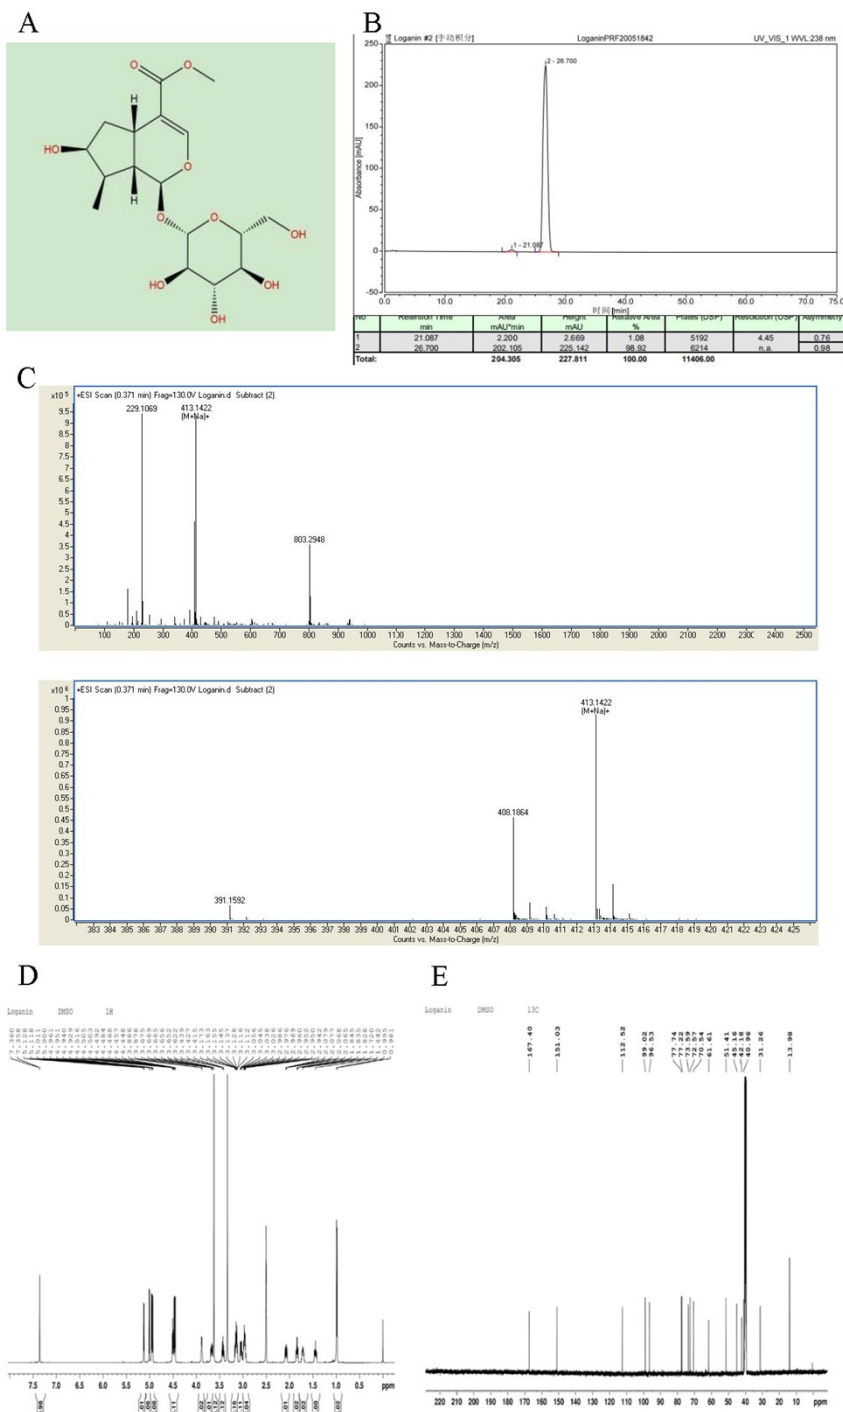

Fig. S3 Prediction model of loganin content constructed by BP-ANN.

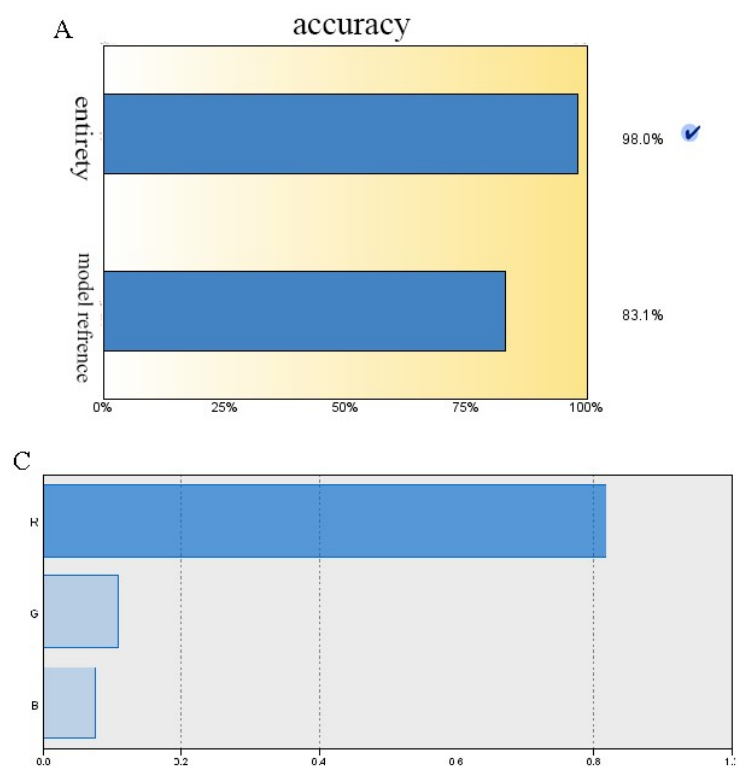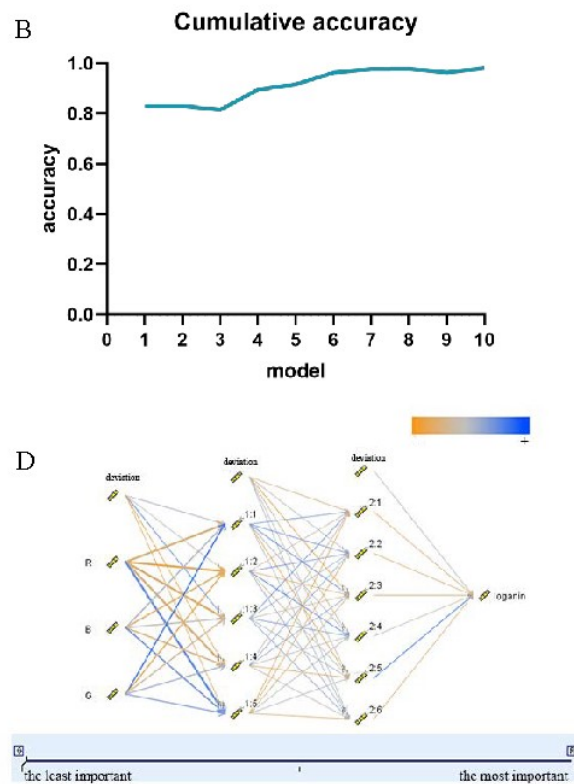

Supplement: d1fo03866d1.pdf [file d1fo03866d1.pdf]
